# Supplementary material
Source: Springer Nature journal article supplement (https://www.springermedizin.de/resource/supplementary/13098_2012_153_MOESM5_ESM.pdf/9670612)

(a)

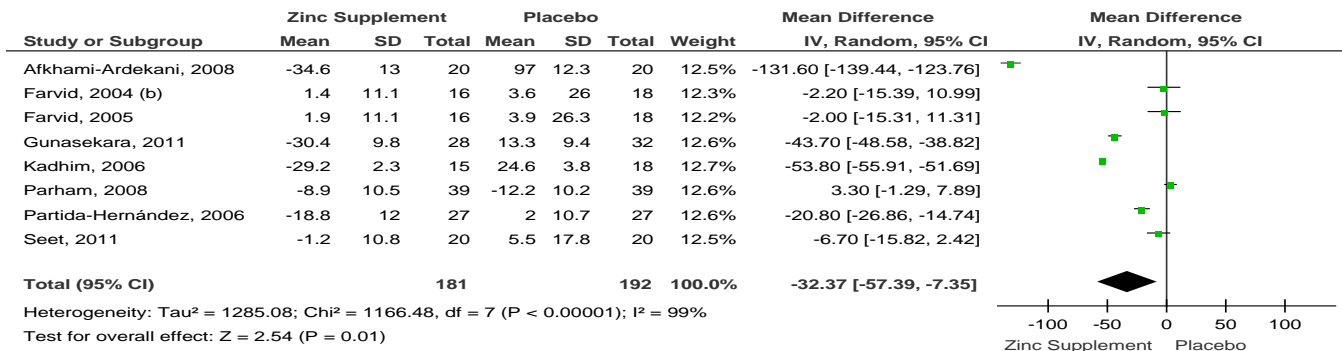

(b)

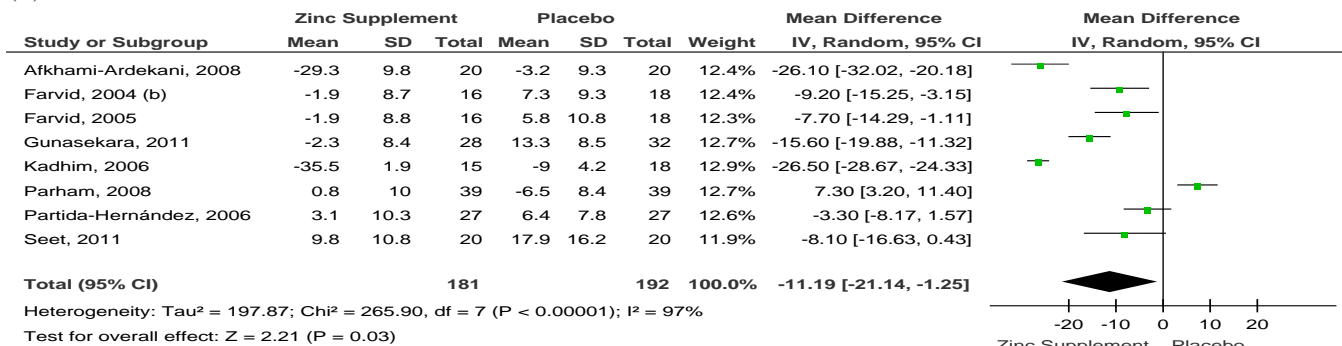

(c)

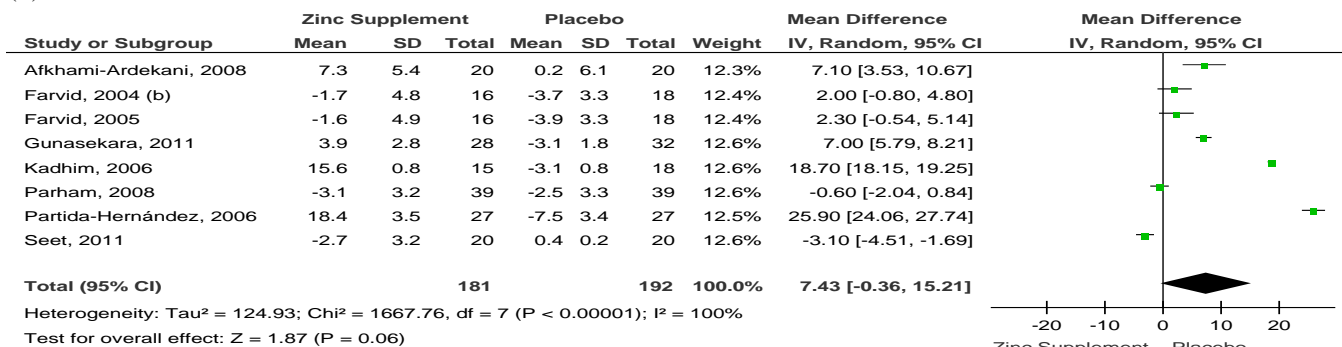

(d)

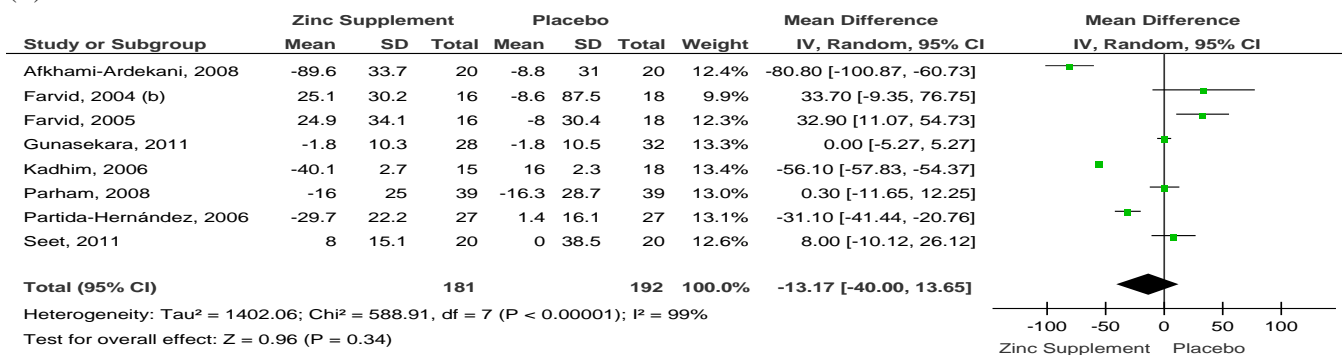

Supplement: MOESM5 [file 9670612]
